# Supplementary material for: Rivalry Type and Cyber Operations: “Hot” Rivalries, “Cold” Rivalries, and Cyber Incidents, 1990–2009
Source: publisher site journal article supplement (doi:10.1515/peps-2020-0046), 2021-01-18
Supplement: Supplementary file 1 [file j_peps-2020-0046_suppl.docx]

**Online Appendix A.**

**Table 1A. Descriptive Statistics**

|  | Obs. | Mean | Std. Dev. | Min. | Max. |
| --- | --- | --- | --- | --- | --- |
| Cyber Threats | 3,110 | 0.08 | 0.79 | 0 | 24 |
| Enduring Rivalry | 3,110 | 0.75 | 1.55 | 0 | 17 |
| Strategic Rivalry | 3,110 | 0.56 | 1.03 | 0 | 6 |
| GDP per capita (logged) | 2,982 | 8.16 | 1.57 | 4.75 | 11.62 |
| Military Spending (logged) | 2,648 | 0.58 | 0.98 | -6.79 | 4.77 |
| Regime Type | 3,110 | 2.84 | 6.74 | -10 | 10 |
| Population (logged) | 3,107 | 16.03 | 1.55 | 12.65 | 21.01 |
| Regime Type | 3,169 | 2.76 | 6.75 | -10 | 10 |
| Media Bias (logged) | 3,071 | 6.27 | 1.93 | 0 | 12.37 |

**Table 2A. Robustness Checks on Alternative Specifications of Enduring Rivalry**

|  | Model 1 | Model 2 |
| --- | --- | --- |
|  |  |  |
| Enduring Rivalry (**1990-2001**) | -0.413*** |  |
|  | (0.154) |  |
| Enduring Rivalry (**1990-2009, ipolate**) |  | -0.260*** |
| ***1990-2001 values extrapolated to 2009 via ipolate*** |  | (0.037) |
| GDP Per Capita (logged) | 0.889*** | 0.217 |
|  | (0.242) | (0.266) |
| Military Spending (logged) | 1.260*** | 0.251 |
|  | (0.477) | (0.638) |
| Regime Type | -0.020 | -0.011 |
|  | (0.018) | (0.025) |
| Total Population (logged) | 1.072*** | 0.399 |
|  | (0.261) | (0.205) |
| Media Bias (logged) | 0.483 | 0.554* |
|  | (0.572) | (0.257) |
| Lagged Dependent Variable | -0.079** | -0.044*** |
|  | (0.034) | (0.009) |
| U.S. Dummy | -0.071 | 0.951 |
|  | (2.169) | (1.490) |
| Constant | -32.038*** | -14.016 |
|  | (6.096) | (8.707) |
|  |  |  |
| Observations | 1,398 | 2,476 |

Robust standard errors in parentheses; GDP per capita, military spending, population, and media bias are logged for normality. *** p<0.01, ** p<0.05, * p<0.1

Note: these robustness estimates use alternative operationalizations of the enduring rivalry data than that used in the main text. See page 22 of the main text for a complete description of these alternative specifications.

**Online Appendix B. Cyber Threat Search Terms**

The following search terms were used to ensure as many cases of cyber threats as

possible were detected: botnet, Chinese firewall, computer worm, cyber, cyber attack, cyber

crime, cyber espionage, cyber sabotage, cyber spying, cyber terror, cyber terrorism, cyber threat,

cyber war, cyber warfare, cyberattack, cyber-attack, cybercrime, cyber-crime, cyberespionage,

cyber-espionage, cyber-sabotage, cyberspace, cyber-space, cyberterror, cyber-terror, cyberterrorism, cyber-terrorism, cyberthreat, cyber-threat, cyberwar, cyber-war, cyberwarfare,

cyber-warfare, DDoS, denial of service, distributed denial of service, firewall, GhostNet, hacked,

hacker, hackers, hacking, hacktivism, industrial espionage, LulzSec, Moonlight Maze, Pentagon

firewall, power grid, Red Hacker Alliance, rootkit, Stuxnet, Titan Rain, Trojan horse virus, and

Trojan horse.
